# Supplementary material
Source: PubMed Central journal article supplement (PMC9903651)
Supplement: mmc1.pdf [file mmc1.pdf]

**Supplemental information**

**The GA4GH Variation Representation Specification:**

**A computational framework for variation**

**representation and federated identification**

**Alex H. Wagner, Lawrence Babb, Gil Alterovitz, Michael Baudis, Matthew Brush, Daniel L. Cameron, Melissa Cline, Malachi Griffith, Obi L. Griffith, Sarah E. Hunt, David Kreda, Jennifer M. Lee, Stephanie Li, Javier Lopez, Eric Moyer, Tristan Nelson, Ronak Y. Patel, Kevin Riehle, Peter N. Robinson, Shawn Rynearson, Helen Schuilenburg, Kirill Tsukanov, Brian Walsh, Melissa Konopko, Heidi L. Rehm, Andrew D. Yates, Robert R. Freimuth, and Reece K. Hart**

## Supplemental Figures

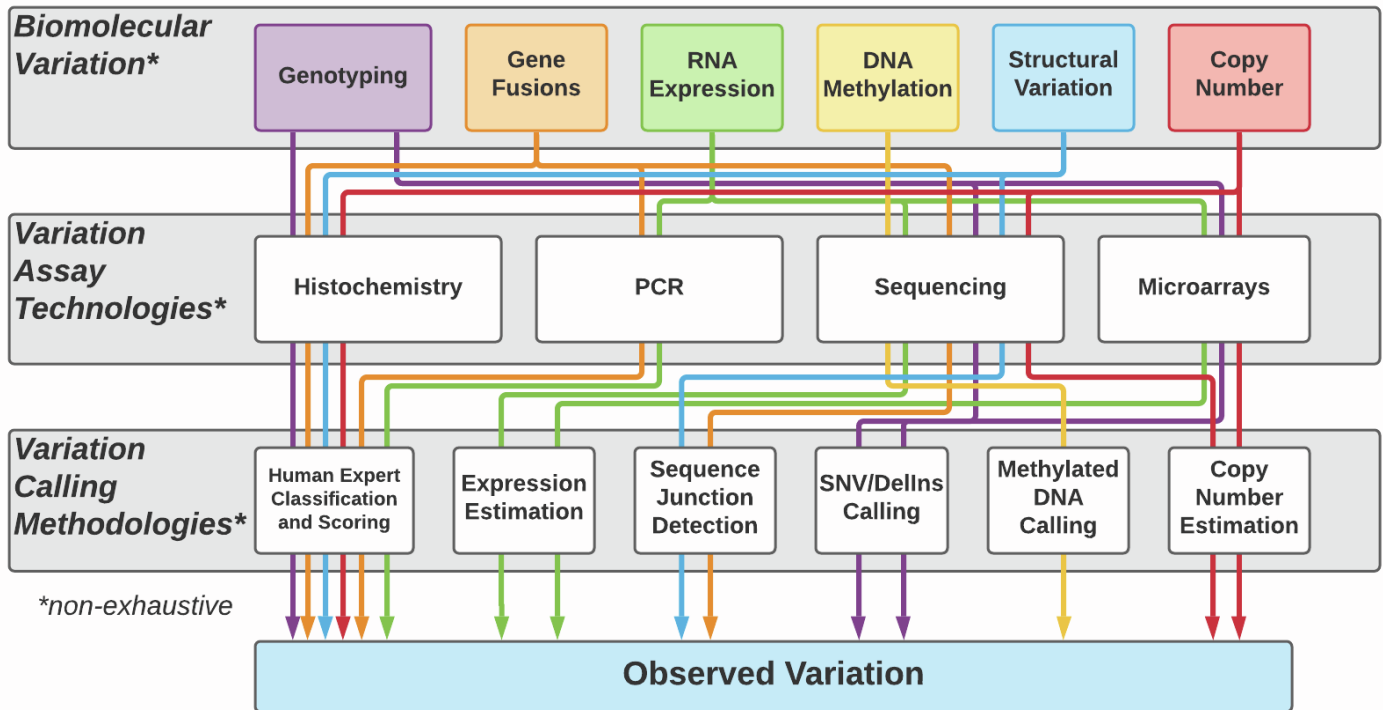

### Supplemental Figure 1 - Variation Pathways

A non-exhaustive set of biomolecular variation concepts (**first row**) that are implemented or planned for the Variation Representation Specification. These variation concepts may be assayed (**second row**) and the assay signals evaluated (**third row**) to generate observed (“called”) variation for downstream evaluation. Observed variation is compared to knowledgebases linking putative biomarkers to evidence informing clinical decision making. The many pathways (**colored arrows**) from variation concept through assay and evaluation result in a disparate collection of variation representations.

**Precise Sequence Location** is composed from a **Sequence Location**, which in turn is composed from a **Sequence Interval** with precise Number values

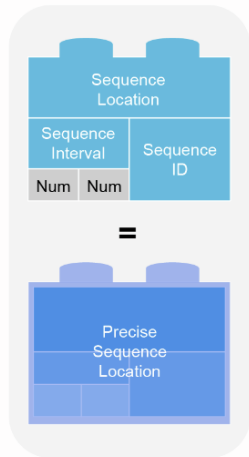

>39 'CAG' repeats in HTT is pathogenic for Huntington's Disease

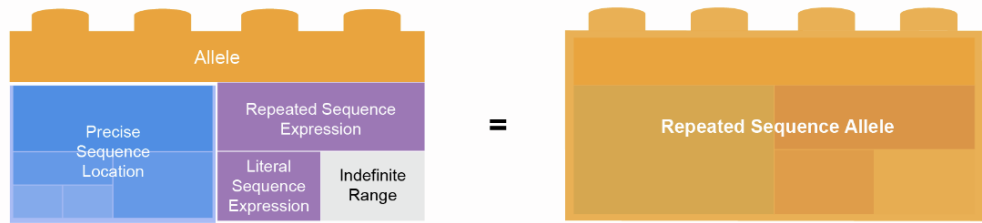

**BRAF V640E** confers sensitivity to Vermurafenib in melanoma

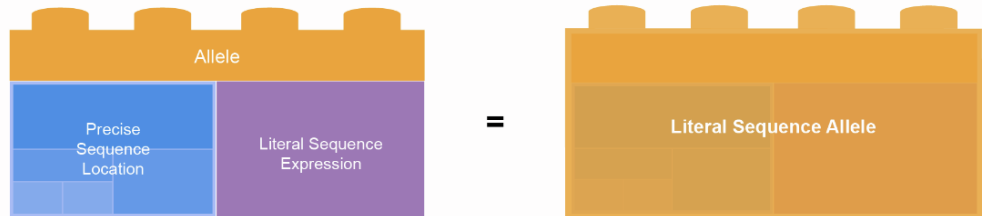

**Tandem Duplication of MSH2 NM\_000251.3:c.511\_583** is pathogenic for Lynch Syndrome

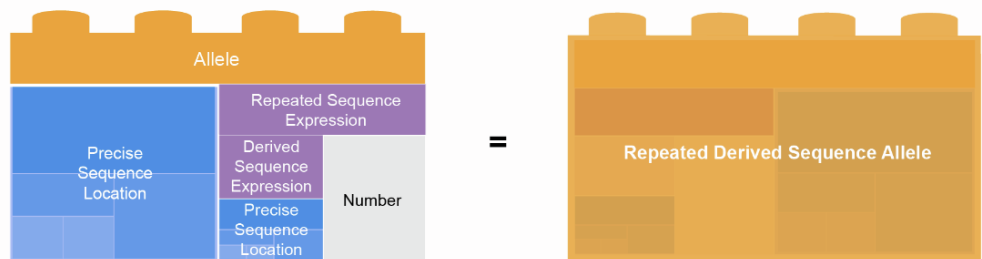

**CYP2C19\*34** has CYP2C19: uncertain function. It is comprised of 3 Literal Sequence Alleles:  
 1) NM\_000769.4(CYP2C19):c.7C>T (p.Pro3Ser), 2) NM\_000769.4(CYP2C19):c.10T>C (p.Phe4Leu), and 3) NM\_000769.4(CYP2C19):c.-13G>A

**Ambiguous Sequence Location** is composed from a **Sequence Location**, which in turn is composed from a **Sequence Interval** with Indefinite Range values

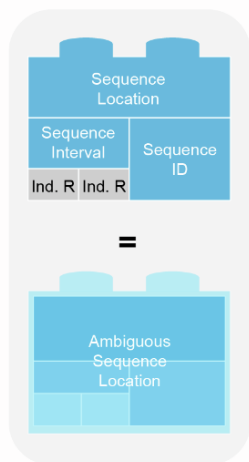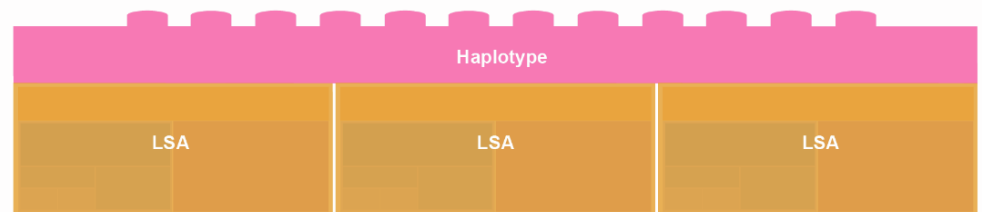

**GRCh38/hg38 14q32.33(chr14:105224887-106877229)x6**  
 (NC\_000014.9:g.(?\_105224887)\_(106877229?)dup (6 to 8 copies) Uncertain Significance

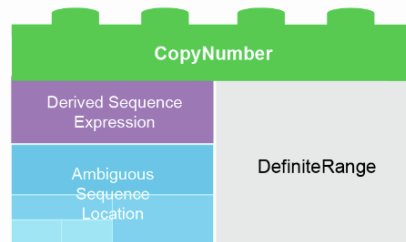

### *Supplemental Figure 2 - Building Blocks of the Variation Representation Specification*

Components of the specification can be used in many different constructs. Sequence Locations can be defined once and added as a component by reference in larger constructs. Haplotypes, for example, are composed from Alleles. Shown here, a Haplotype (pink brick) is constructed of three Literal Sequence Alleles (LSA; orange bricks). Literal Sequence Alleles are in turn composed from Literal Sequence Expressions (purple bricks) and Precise Sequence Locations (blue bricks) or Ambiguous Sequence Locations (light blue bricks), which in turn are composed from Intervals, Sequence IDs, and supporting primitive concepts. These same underlying components are used to support other VRS variation types, such as Copy Number (green bricks).

**Supplemental Table 1 - Features of Variation Representation Specifications**

| <b>Specification</b> | <b>Purpose</b>                           | <b>Reference Types</b>      | <b>Sequence Coordinates</b> | <b>Allele Normalization</b> | <b>Reference</b>                                                                                                                  |
|----------------------|------------------------------------------|-----------------------------|-----------------------------|-----------------------------|-----------------------------------------------------------------------------------------------------------------------------------|
| HGVS                 | Human readable variant descriptions      | Sequences                   | Residue                     | 3-prime shifted             | <a href="http://varnomen.hgvs.org/">http://varnomen.hgvs.org/</a>                                                                 |
| ISCN                 | Human readable cytogenomic events        | Cytobands                   | N/A                         |                             | <a href="https://www.karger.com/Book/Home/271658">https://www.karger.com/Book/Home/271658</a>                                     |
| SPDI                 | Human readable variant descriptors       | Sequences                   | Inter-residue               | Full-justification          | <a href="https://www.ncbi.nlm.nih.gov/variation/notation/">https://www.ncbi.nlm.nih.gov/variation/notation/</a>                   |
| PGx                  | Human readable CYP haplotype descriptors | CYP Alleles                 | N/A                         |                             | <a href="https://www.phamvar.org/criteria">https://www.phamvar.org/criteria</a>                                                   |
| VCF                  | Flat-file variant records                | Chromosomal Sequences       | Residue                     | Left-shifted                | <a href="https://samtools.github.io/hts-specs/VCFv4.3.pdf">https://samtools.github.io/hts-specs/VCFv4.3.pdf</a>                   |
| MAF                  | Multisample flat-file variant records    | Chromosomal Sequences       | Residue                     | Left-shifted                | <a href="https://docs.gdc.cancer.gov/Data/File_Formats/MAF_Format/">https://docs.gdc.cancer.gov/Data/File_Formats/MAF_Format/</a> |
| VRS                  | Inter-system variation exchange          | Sequences, Cytobands, Genes | Inter-residue               | Full-justification          | <a href="https://vrs.qa4gh.org/">https://vrs.qa4gh.org/</a>                                                                       |

**Supplemental Table 2 - VRS Implementations**

| <b>Resource</b>           | <b>Usage</b>                 | <b>Language</b> | <b>Status</b>    | <b>Example / documentation</b>                                                                                                                                                                                                                                |
|---------------------------|------------------------------|-----------------|------------------|---------------------------------------------------------------------------------------------------------------------------------------------------------------------------------------------------------------------------------------------------------------|
| BRCA Exchange             | Allele search                | Python          | Live             | <a href="https://brcaexchange.org/backend/data/vrid/?vr_id=ga4gh:VA.Z6PI2AKspOXLbCgmyw6JYQxRAoF_qj92">https://brcaexchange.org/backend/data/vrid/?vr_id=ga4gh:VA.Z6PI2AKspOXLbCgmyw6JYQxRAoF_qj92</a>                                                         |
| ClinGen Allele Registry   | Allele translator            | C++             | Live             | <a href="https://reg.clinicalgenome.org/vrAllele?hgvs=NC_000007.14:g.55181320A&gt;T">https://reg.clinicalgenome.org/vrAllele?hgvs=NC_000007.14:g.55181320A&gt;T</a>                                                                                           |
| ELIXIR Beacon Network     | Variation search             | Python          | In progress      |                                                                                                                                                                                                                                                               |
| NCBI                      | Allele id constructor (POST) | C++             | Live             | <a href="https://api.ncbi.nlm.nih.gov/variation/v0">https://api.ncbi.nlm.nih.gov/variation/v0</a>                                                                                                                                                             |
| VICC MetaKB               | Variation search             | Python          | Live             | <a href="https://search.cancervariants.org/api/v1/associations?size=10&amp;from=1&amp;q=ga4gh:VA.mJbjSsW541oOsOtBoX36Mppr6hMbjFr">https://search.cancervariants.org/api/v1/associations?size=10&amp;from=1&amp;q=ga4gh:VA.mJbjSsW541oOsOtBoX36Mppr6hMbjFr</a> |
| VICC Variation Normalizer | String parsing to VRS        | Python          | Live             | <a href="https://normalize.cancervariants.org/variation">https://normalize.cancervariants.org/variation</a>                                                                                                                                                   |
| vrs-python                | Open Python Implementation   | Python          | Released on PyPI | <a href="https://pypi.org/project/ga4gh.vr/">https://pypi.org/project/ga4gh.vr/</a>                                                                                                                                                                           |
| AnyVar                    | Variant Registration Service | Python          | In progress      |                                                                                                                                                                                                                                                               |
| MyVariant.info            | Variation search             | Python          | Planned          |                                                                                                                                                                                                                                                               |
| Ensembl                   | Variant Recoder and VEP      | Perl            | In progress      |                                                                                                                                                                                                                                                               |
